# Supplementary material
Source: Springer Nature journal article supplement (https://www.springermedizin.de/resource/supplementary/12963_2010_138_MOESM6_ESM.pdf/9572738)

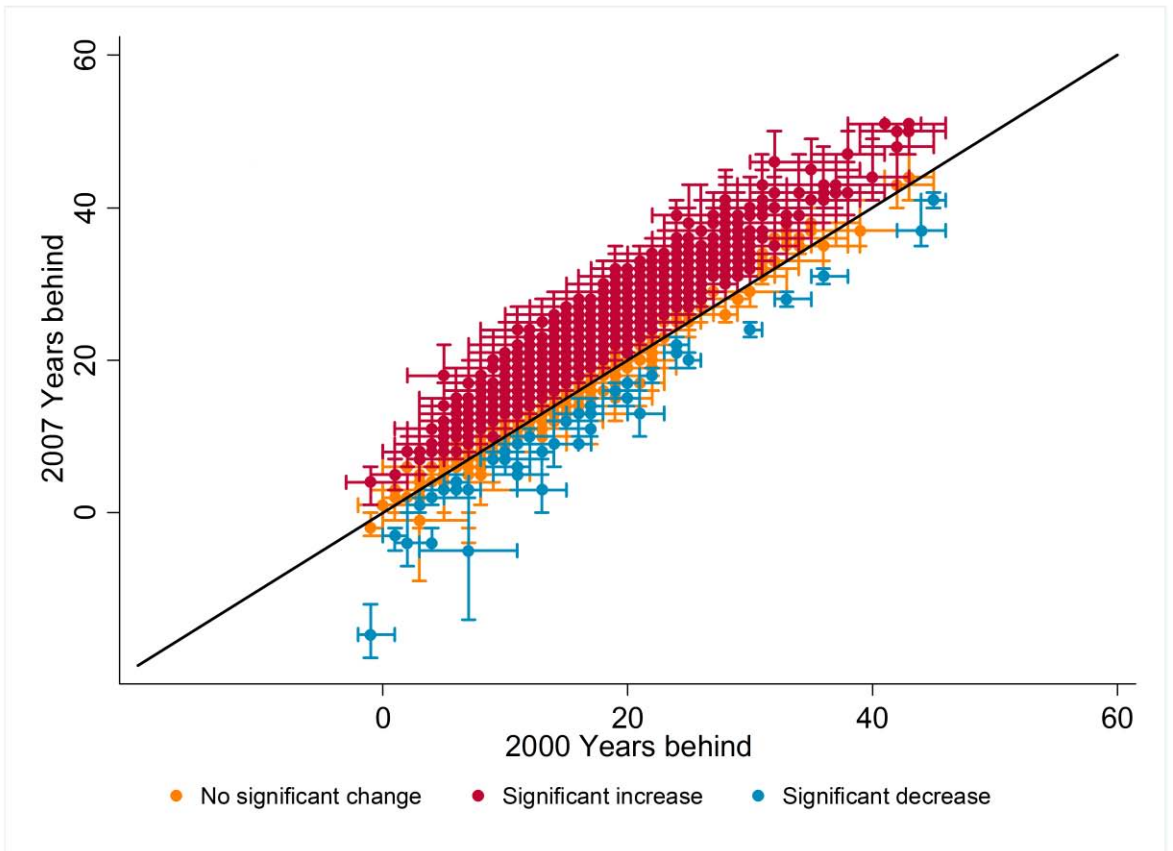

Females

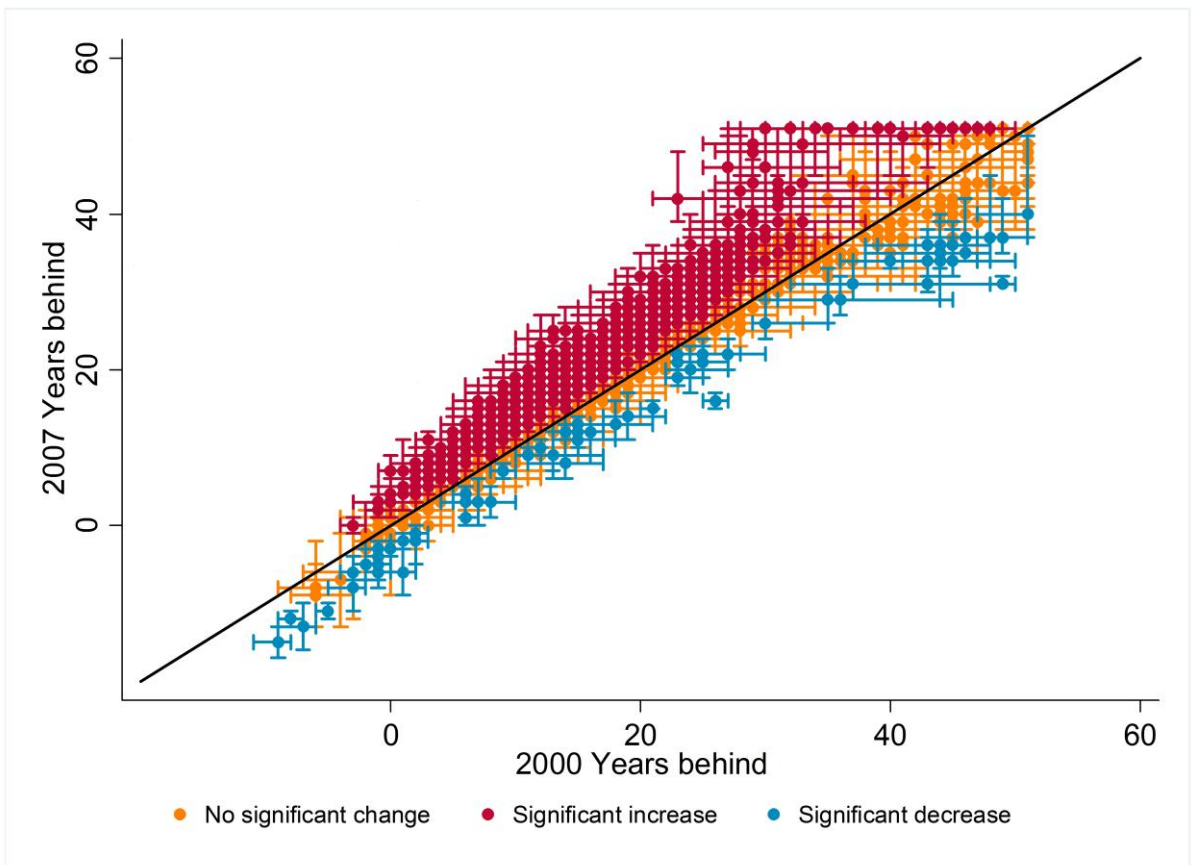

Males

Supplement: MOESM6 [file 9572738]
